# Supplementary material for: Efficient photoelectrochemical water oxidation using a TiO2 nanosphere-decorated BiVO4 heterojunction photoanode
Source: Royal Society of Chemistry journal article supplement (doi:10.1039/c8ra09072f), 2018-01-01
Supplement: c8ra09072f1.pdf [file c8ra09072f1.pdf]

## Supporting information

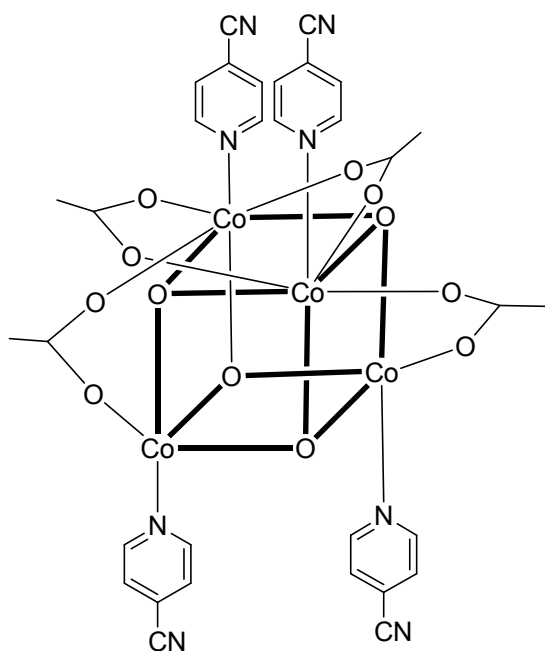

**Figure S1.** The structure of Co-cubane catalyst

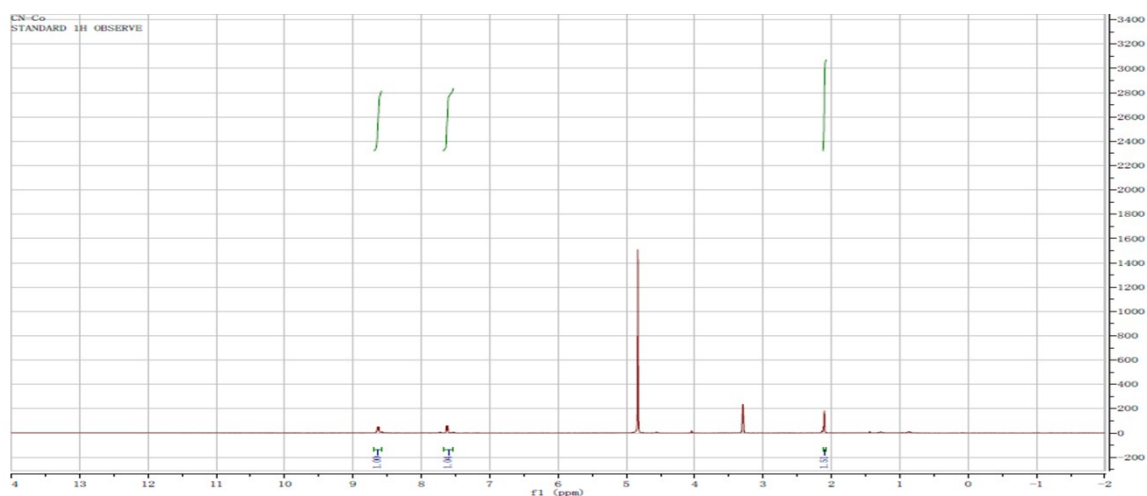

**Figure S2.**  $^1\text{H-NMR}$  of the Co-cubane catalyst

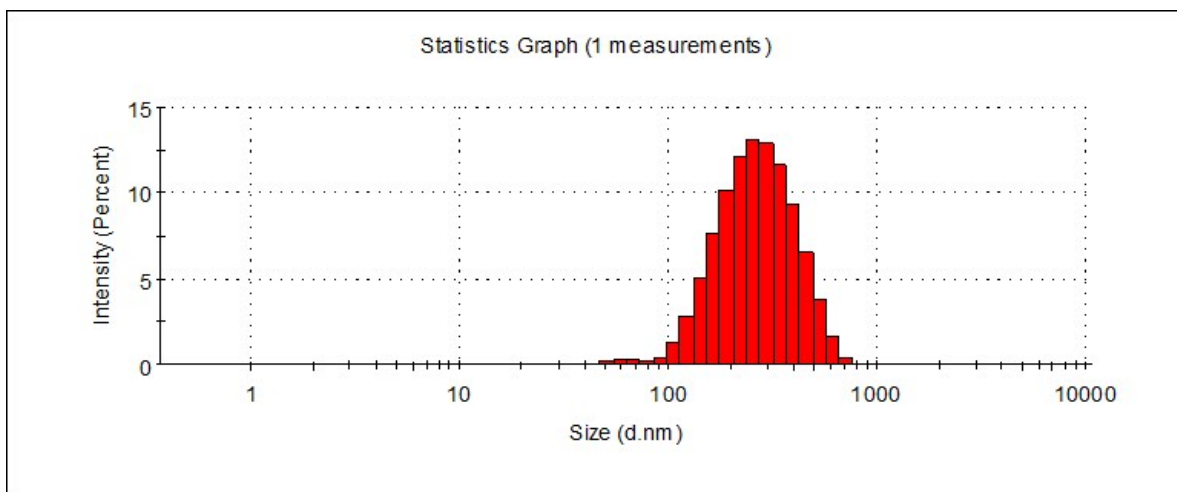

**Figure S3.** Dynamic Light Scattering(DLS) of nanosphere  $\text{TiO}_2$

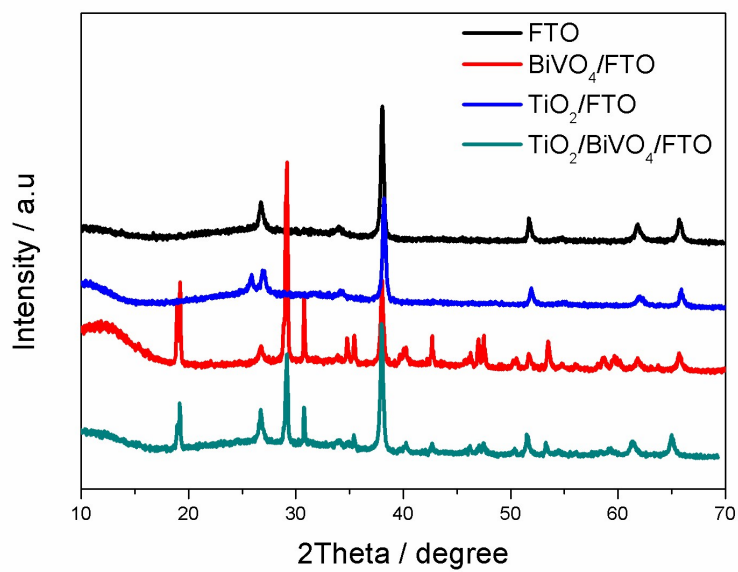

**Figure S4.** The XRD of  $\text{BiVO}_4$ ,  $\text{TiO}_2$  and  $\text{TiO}_2/\text{BiVO}_4$  electrodes

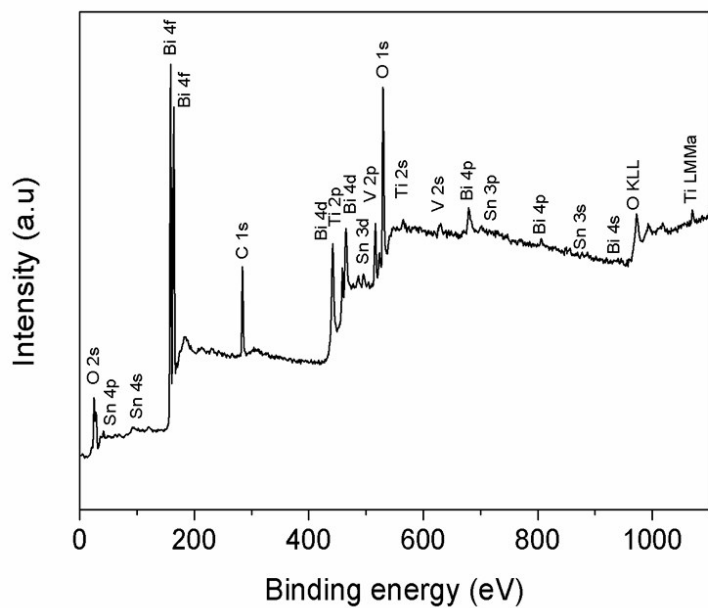

**Figure S5.** The XPS spectrum of  $\text{TiO}_2/\text{BiVO}_4/\text{FTO}$  electrode

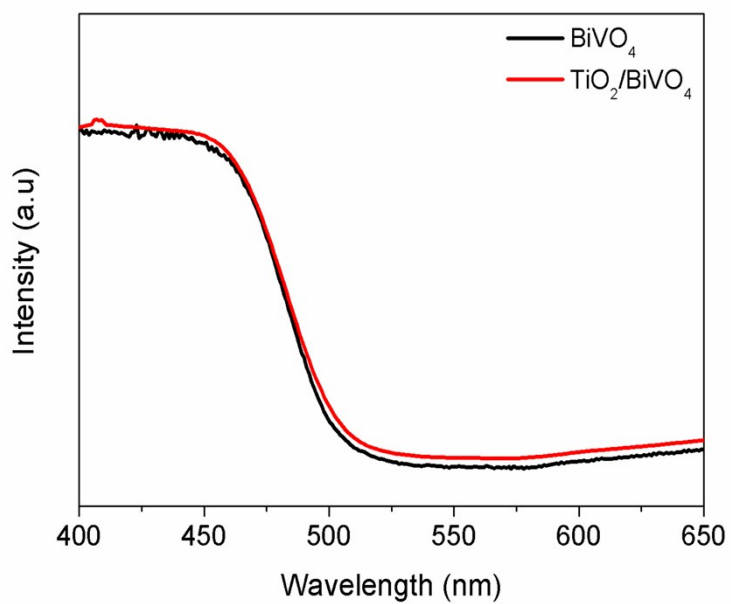

**Figure S6.** The UV-spectrum of  $\text{BiVO}_4$  and  $\text{TiO}_2/\text{BiVO}_4$  electrodes

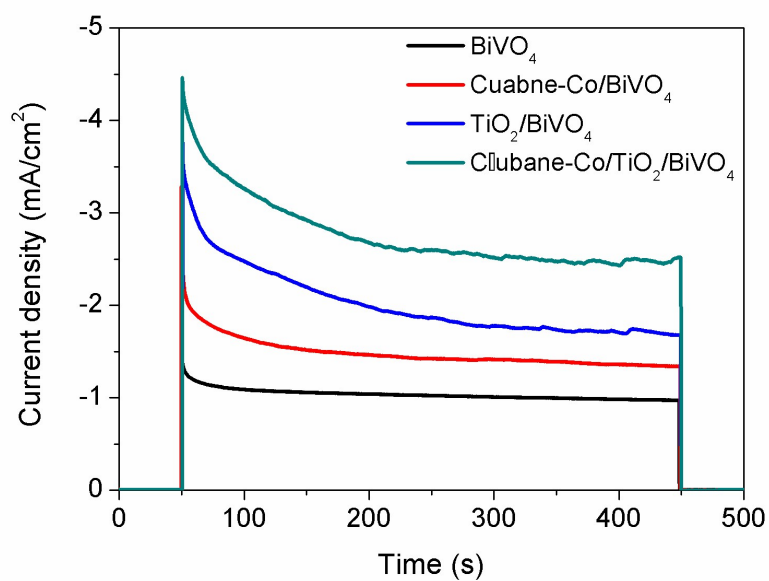

**Figure S7.** J-t cures of Cubane-Co/TiO<sub>2</sub>/BiVO<sub>4</sub>, Cubane-Co/BiVO<sub>4</sub> TiO<sub>2</sub>/BiVO<sub>4</sub> and BiVO<sub>4</sub> electrodes in PBS solution at 1.23 V vs. RHE.

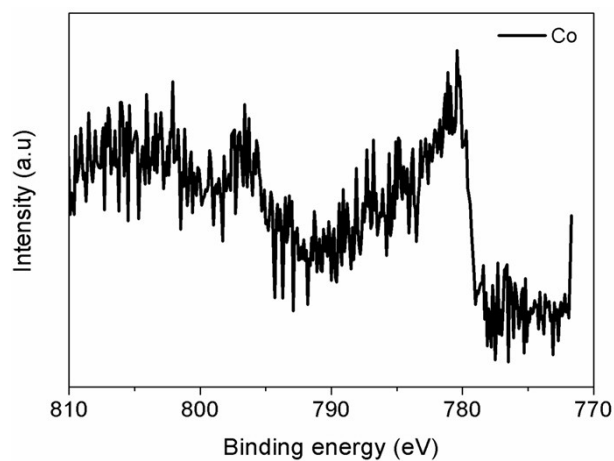

**Figure S8.** XPS spectra of the Co-cubane/TiO<sub>2</sub>/BiVO<sub>4</sub> electrode

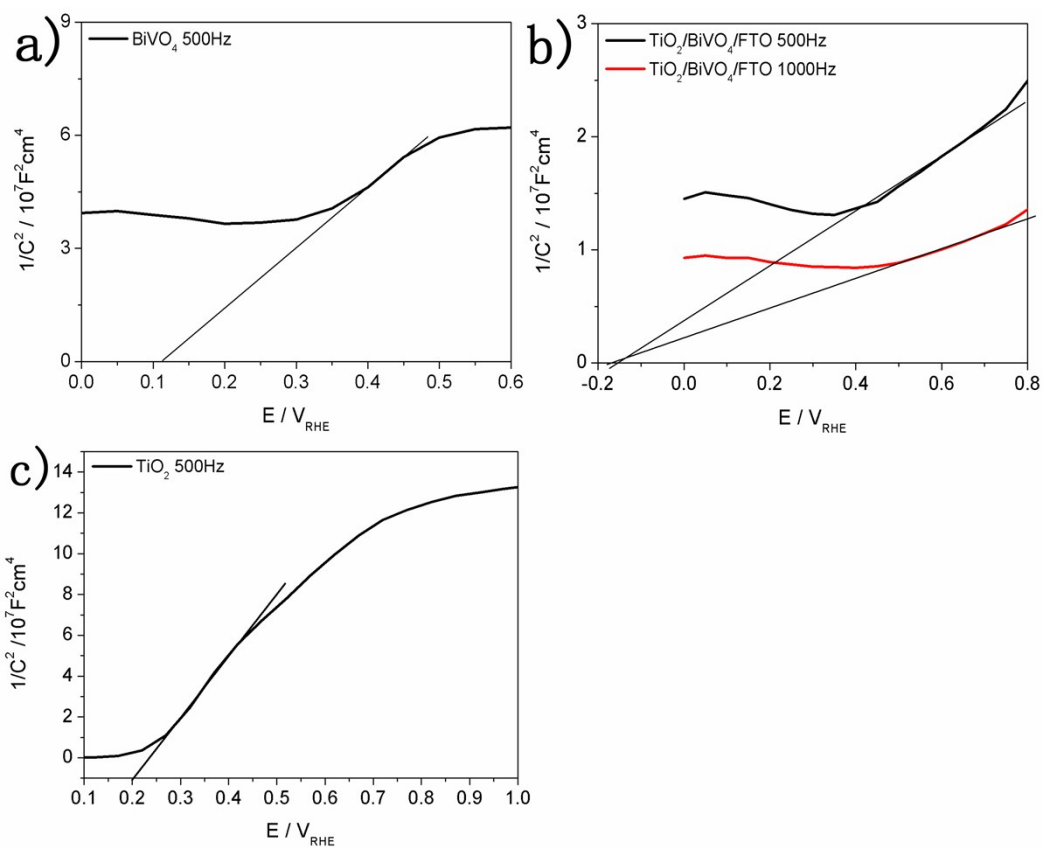

**Figure S9.** The Mott-Schottky plots of  $BiVO_4$  and  $TiO_2$  measured in 0.1 M PBS solution

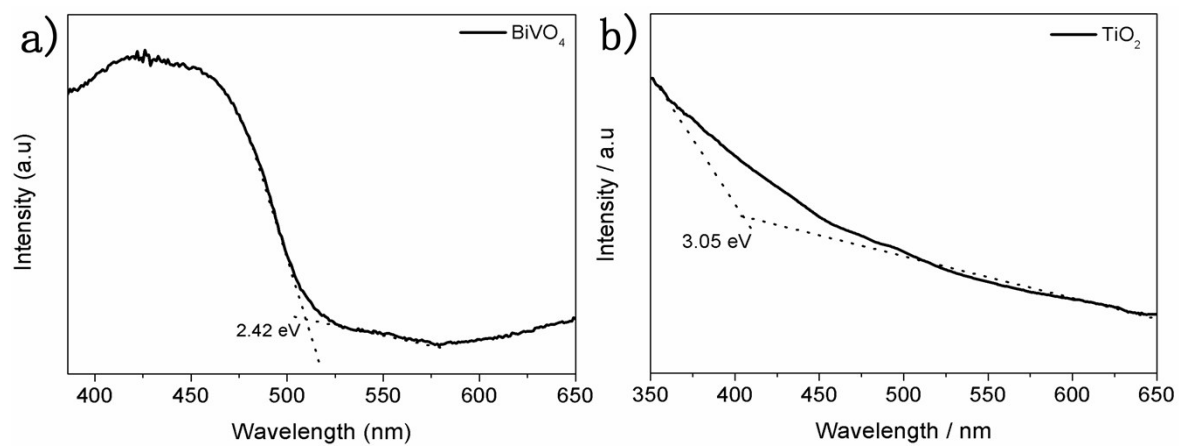

**Figure S10.** UV-Vis absorption spectrum of  $BiVO_4$  and  $TiO_2$
